# Supplementary material
Source: PubMed Central journal article supplement (PMC4418924)
Supplement: pnas.201505874SI.pdf [file pnas.201505874SI.pdf]

# Supporting Information

Wu and Navrotsky 10.1073/pnas.1505874112

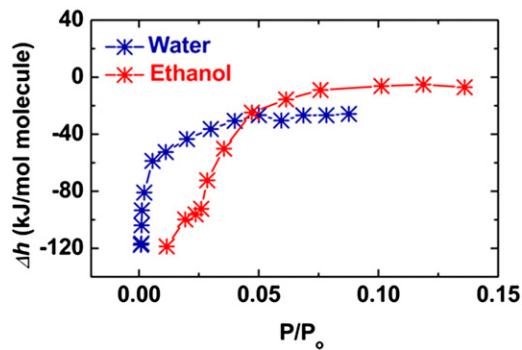

Fig. S1. Differential enthalpies of water and ethanol adsorption for NMT-2 as function of partial pressure ( $P/P_0$ ) at 25 °C. It is suggested that at any  $P/P_0$  below 0.05, the differential enthalpy of ethanol adsorption is more exothermic than that of water. The water adsorption calorimetry data for NMT-2 are reproduced from ref. 1.

1. Forbes TZ, Radha AV, Navrotsky A (2011) The energetics of nanophase calcite. *Geochim Cosmochim Acta* 75(24):7893–7905.

Table S1. Properties of calcite nanocrystals studied (1)

| Sample | Source                             | Chemical composition                                                           | Transmission electron microscopy particle size, nm | Brunauer–Emmett–Teller surface area, m <sup>2</sup> /mol |
|--------|------------------------------------|--------------------------------------------------------------------------------|----------------------------------------------------|----------------------------------------------------------|
| SM-1   | Specialty Minerals, Inc.           | Ca <sub>0.996</sub> Mg <sub>0.004</sub> CO <sub>3</sub> ·0.052H <sub>2</sub> O | 92 ± 2                                             | 1,895 ± 16                                               |
| SS-1   | SpringSky Nanomaterials            | Ca <sub>0.990</sub> Mg <sub>0.010</sub> CO <sub>3</sub> ·0.055H <sub>2</sub> O | 133 ± 4                                            | 1,321 ± 18                                               |
| NMT-1  | NanoMaterials Technology Co., Ltd. | Ca <sub>0.990</sub> Mg <sub>0.010</sub> CO <sub>3</sub> ·0.038H <sub>2</sub> O | 119 ± 3                                            | 1,488 ± 15                                               |
| NMT-2  | NanoMaterials Technology Co., Ltd. | Ca <sub>0.990</sub> Mg <sub>0.010</sub> CO <sub>3</sub> ·0.069H <sub>2</sub> O | 65 ± 2                                             | 2,243 ± 9                                                |

1. Forbes TZ, Radha AV, Navrotsky A (2011) The energetics of nanophase calcite. *Geochim Cosmochim Acta* 75(24):7893–7905.
